# Supplementary material for: Lanthanide(iii) coordination polymers for luminescence detection of Fe(iii) and picric acid
Source: Royal Society of Chemistry journal article supplement (doi:10.1039/c8nj02546k), 2018-01-01
Supplement: c8nj02546k1.pdf [file c8nj02546k1.pdf]

## *Supplementary Information of*

# **Lanthanide (III) Coordination Polymers for Luminescent Detection of Fe (III) and Picric Acid**

Cong Xu<sup>a</sup>, Haipeng Huang<sup>a</sup>, Jingxin Ma<sup>b</sup>, Wei Liu<sup>a</sup>, Chunyang Chen<sup>a</sup>, Xin Huang<sup>a</sup>, Lizi Yang<sup>a</sup>, Fu-Xing Pan<sup>a</sup>, and Weisheng Liu<sup>a,\*</sup>

- a. Key Laboratory of Nonferrous Metals Chemistry and Resources Utilization of Gansu Province and State Key Laboratory of Applied Organic Chemistry, College of Chemistry and Chemical Engineering, Lanzhou University, Lanzhou 730000, P. R. China  
Email: liuws@lzu.edu.cn Tel: +86 931-8915151
- b. College of Chemistry and Chemical Engineering, Ningxia University, Yinchuan 750021, P.R. China.

## **Content**

1. Luminescence lifetime decay profiles of **EuBr** and **TbBr**. **Figure S1.**
2. The Emission spectra of **EuBr** and **TbBr** with nitroaromatics and the Stern-Volmer (SV) plot curve. **Figure S2-6.**
3. The spectral overlap between normalized excitation spectrum of **EuBr** and **TbBr** and normalized absorbance spectra of nitro explosives. **Figure S7.**
4. Anion selectivity of **EuBr** and **TbBr** in water. **Figure S8.**
5. The PXRD patterns of **EuBr** and **TbBr**. **Figure S9.**
6. The PXRD patterns of **EuBr** and **TbBr** treated by various solvent for 24h. **Figure S10.**
7. The Reproducibility of the quenching ability of **EuBr** and **TbBr**. **Figure S11.**
8. The ORTEP-style image of **EuBr** and **TbBr**. **Figure S12.**
9. The crystal structure of **EuBr**. **Figure S13.**
10. The crystal structure of **TbBr**. **Figure S14.**
11. The Stern-Volmer equations and quenching effect constant ( $K_{sv}$ ) of **EuBr** and **TbBr** for nitro-explosive analytes. **Table S1.**

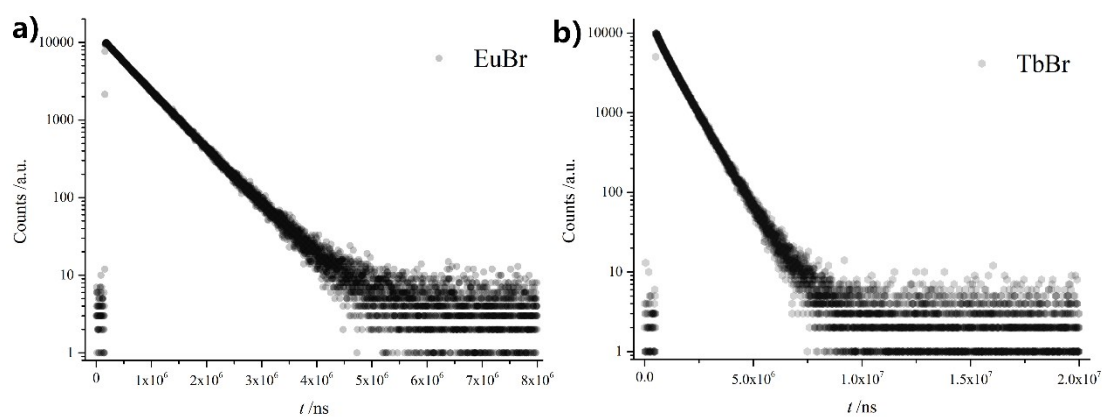

**Figure S1.** Luminescence lifetime decay profiles of a) **EuBr** and b) **TbBr**.

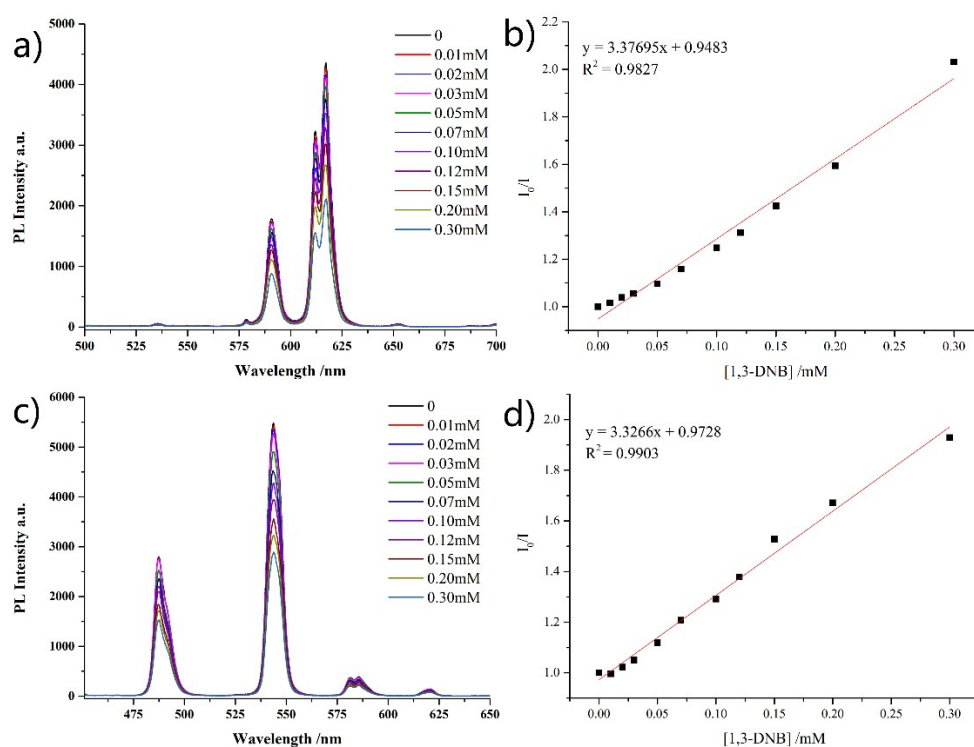

**Figure S2.** a) The Emission of **EuBr** with different concentrations of 1,3-Dinitrobenzene. b) The Stern-Volmer (SV) plot of  $I_0/I$  versus increasing concentrations of 1,3-Dinitrobenzene. c) The Emission of **TbBr** with different concentrations of 1,3-Dinitrobenzene. d) The Stern-Volmer (SV) plot of  $I_0/I$  versus increasing concentrations of 1,3-Dinitrobenzene.

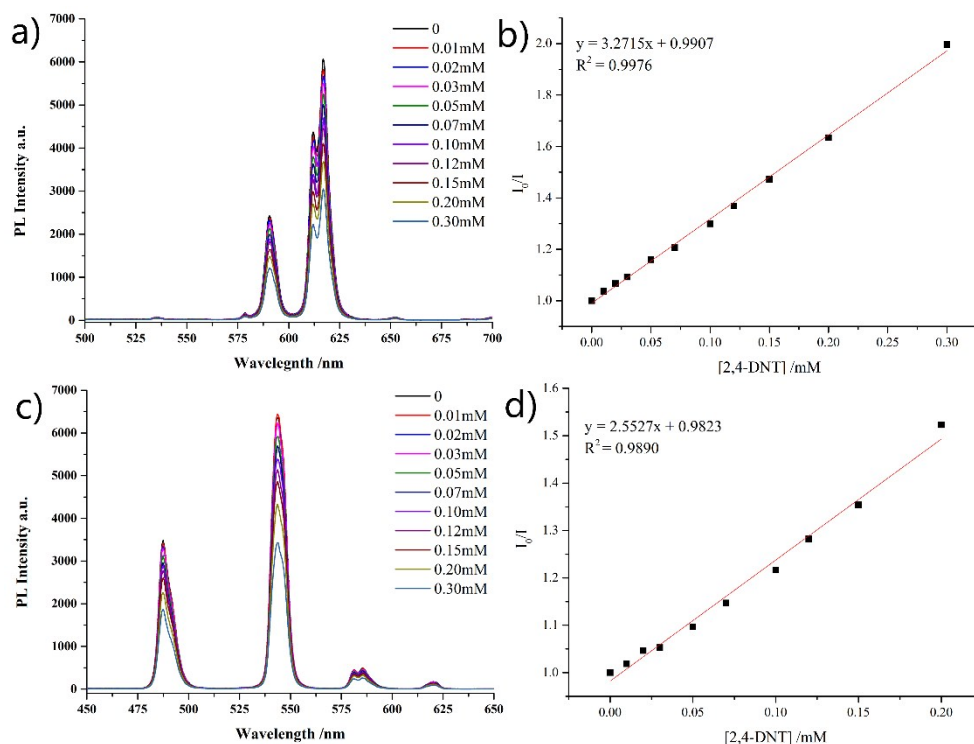

**Figure S3.** a) The Emission of **EuBr** with different concentrations of 2,4-Dinitrotoluene. b) The Stern-Volmer (SV) plot of  $I_0/I$  versus increasing concentrations of 2,4-Dinitrotoluene. c) The Emission of **TbBr** with different concentrations of 2,4-Dinitrotoluene. d) The Stern-Volmer (SV) plot of  $I_0/I$  versus increasing concentrations of 2,4-Dinitrotoluene.

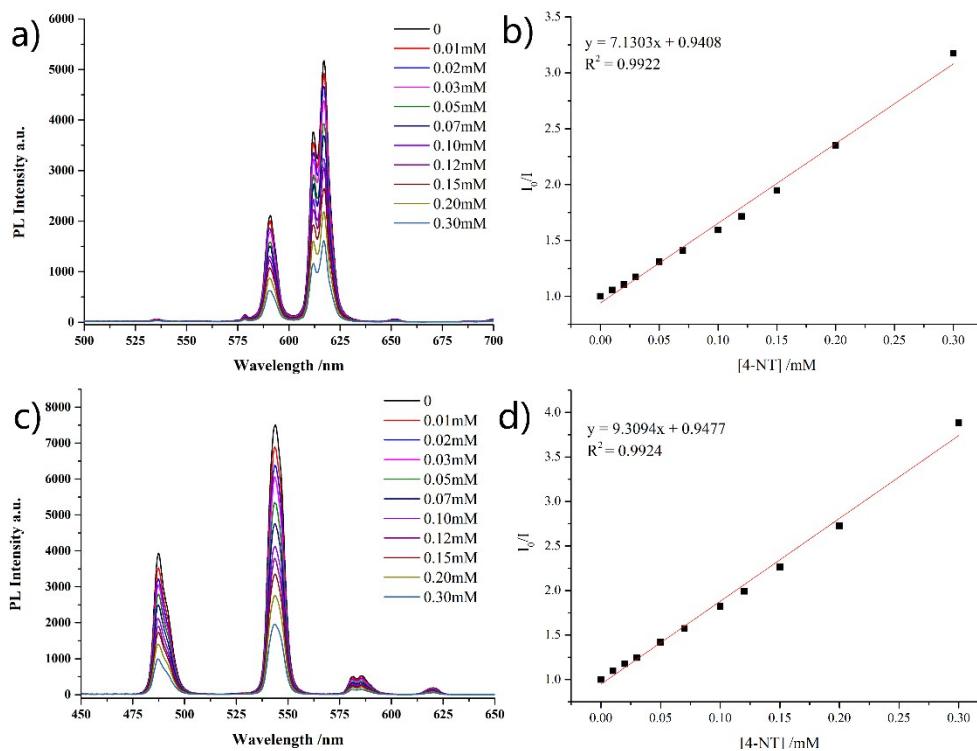

**Figure S4.** a) The Emission of **EuBr** with different concentrations of 4-Nitrotoluene. b) The Stern-Volmer (SV) plot of  $I_0/I$  versus increasing concentrations of 4-Nitrotoluene. c) The Emission of **EuBr** with different concentrations of 4-Nitrotoluene. d) The Stern-Volmer (SV) plot of  $I_0/I$  versus increasing concentrations of 4-Nitrotoluene.

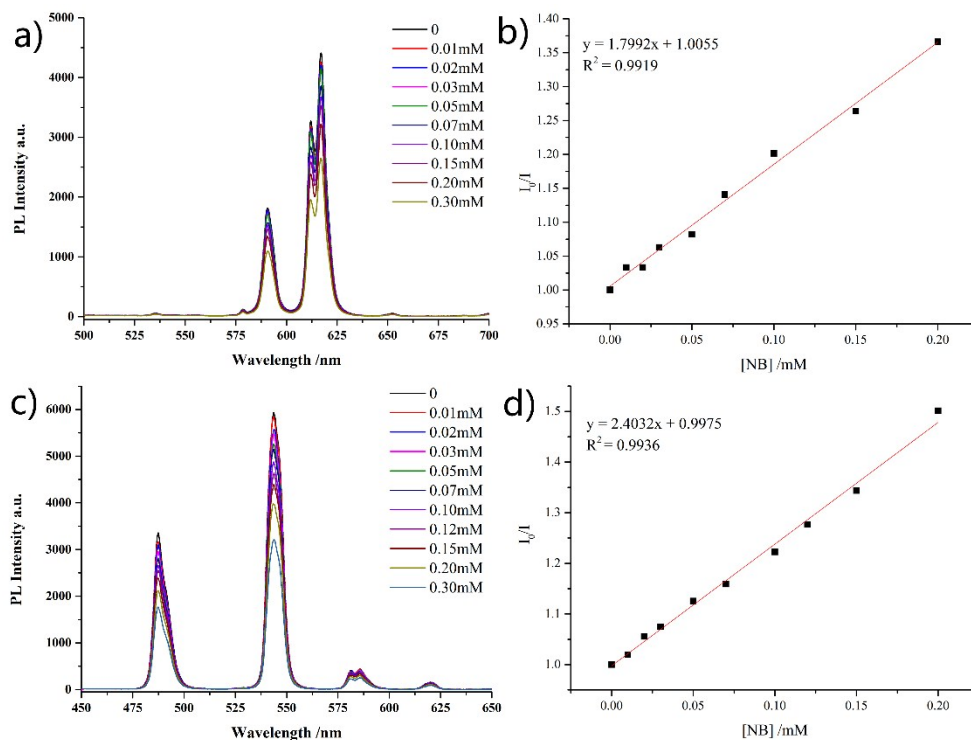

**Figure S5.** a) The Emission of **EuBr** with different concentrations of Nitrobenzene. b) The Stern-Volmer (SV) plot of  $I_0/I$  versus increasing concentrations of Nitrobenzene. c) The Emission of **TbBr** with different concentrations of Nitrobenzene. d) The Stern-Volmer (SV) plot of  $I_0/I$  versus increasing concentrations of Nitrobenzene.

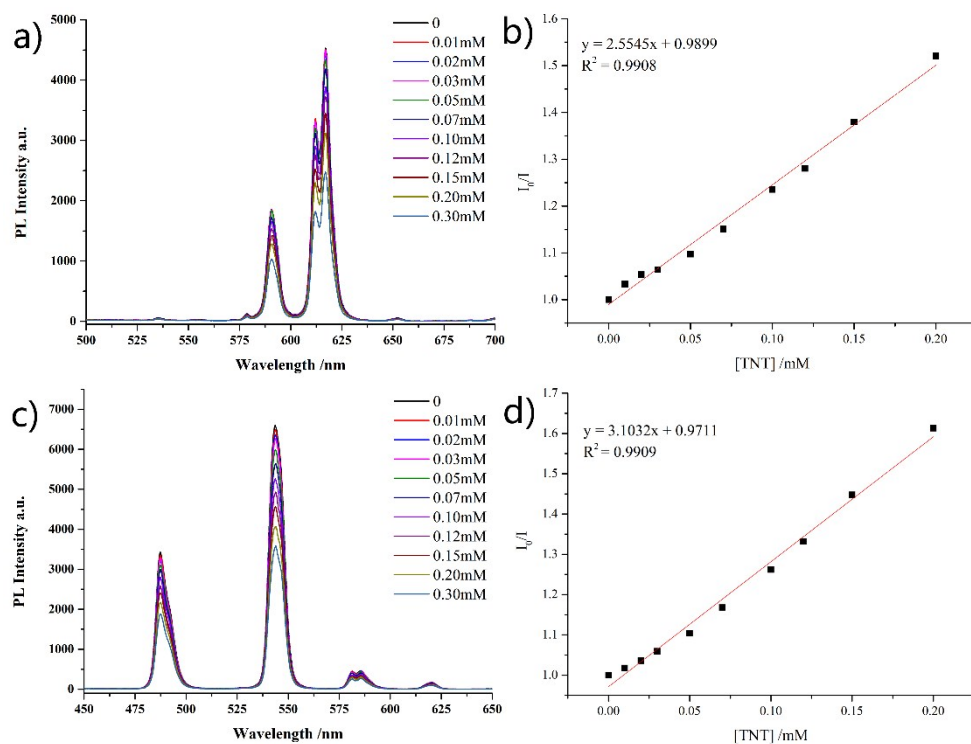

**Figure S6.** a) The Emission of **EuBr** with different concentrations of 2,4,6-Trinitrotoluene. b) The Stern-Volmer (SV) plot of  $I_0/I$  versus increasing concentrations of 2,4,6-Trinitrotoluene. c) The Emission of **TbBr** with different concentrations of 2,4,6-Trinitrotoluene. d) The Stern-Volmer (SV) plot of  $I_0/I$  versus increasing concentrations of 2,4,6-Trinitrotoluene.

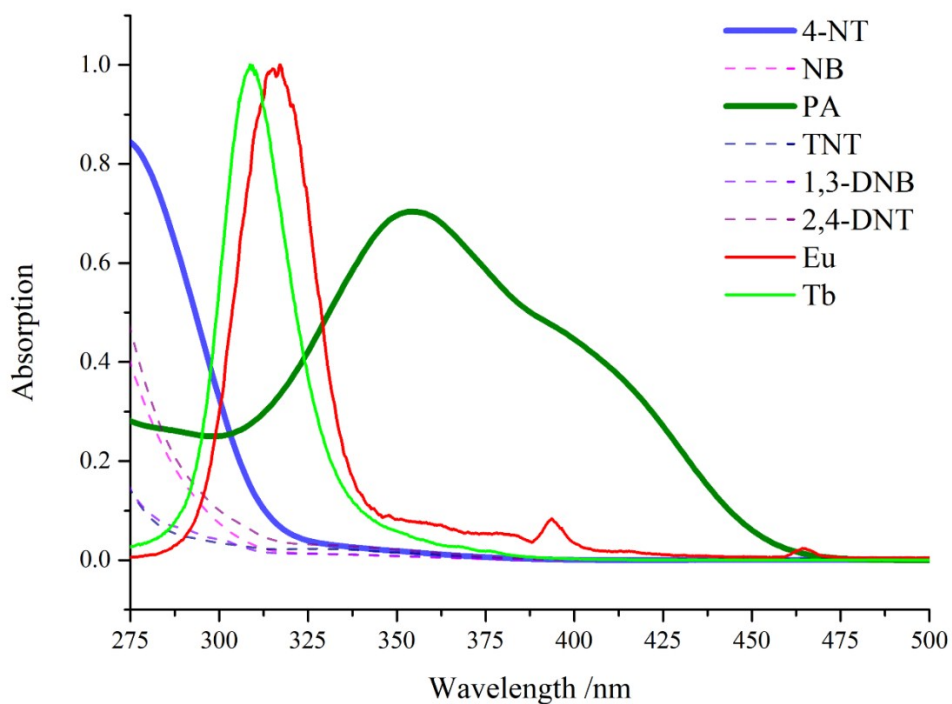

**Figure S7.** The spectral overlap between normalized excitation spectrum of **EuBr** and **TbBr** and normalized absorbance spectra of nitro explosives.

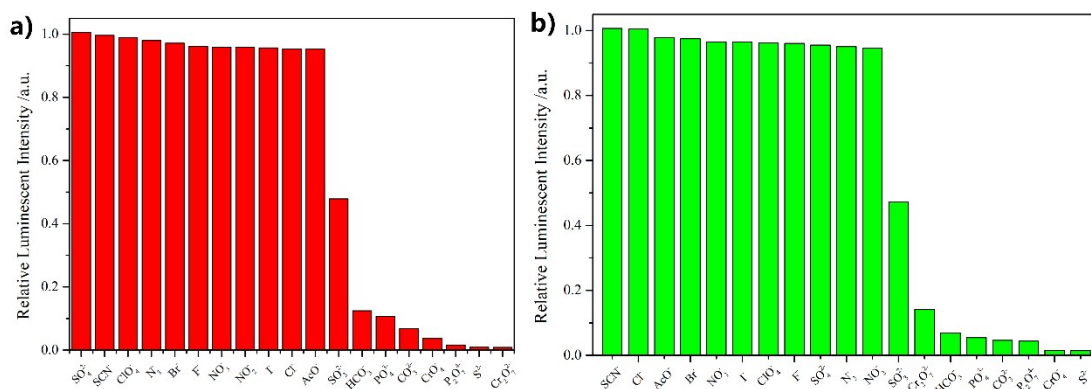

**Figure S8.** Anion selectivity of a) **EuBr** and b) **TbBr** ( $I_0/I$ , 1mM) in water.

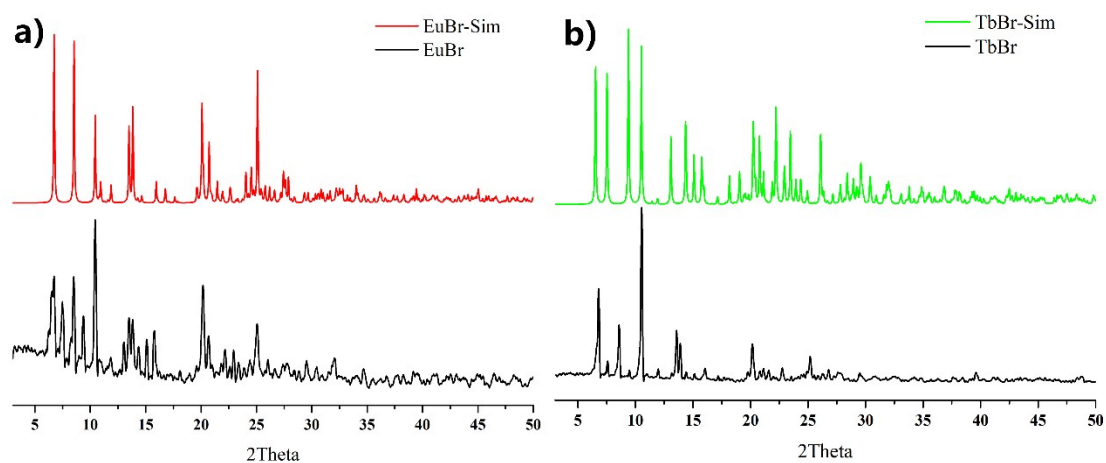

**Figure S9.** The PXRD patterns of **EuBr** and **TbBr**.

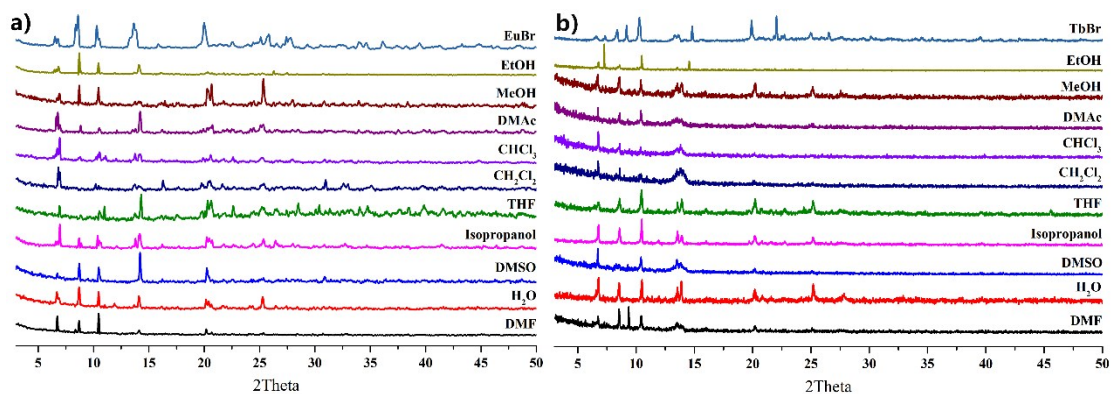

**Figure S10.** The PXRD patterns of a) **EuBr** and b) **TbBr** treated by various solvent for 24h.

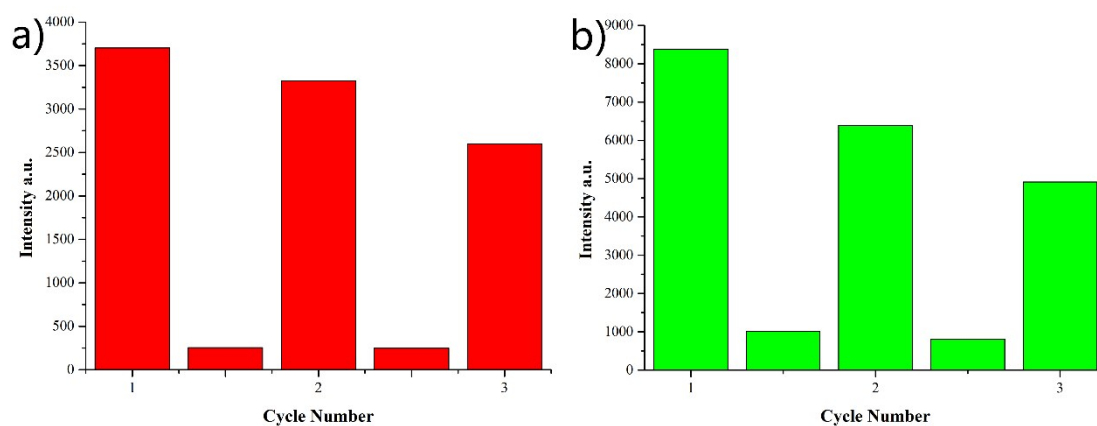

**Figure S11.** Reproducibility of the quenching ability of a) **EuBr** 617nm and b) **TbBr** 544nm in water and in the presence of 0.5mM PA (ex= 317nm for EuBr, 309nm for TbBr).

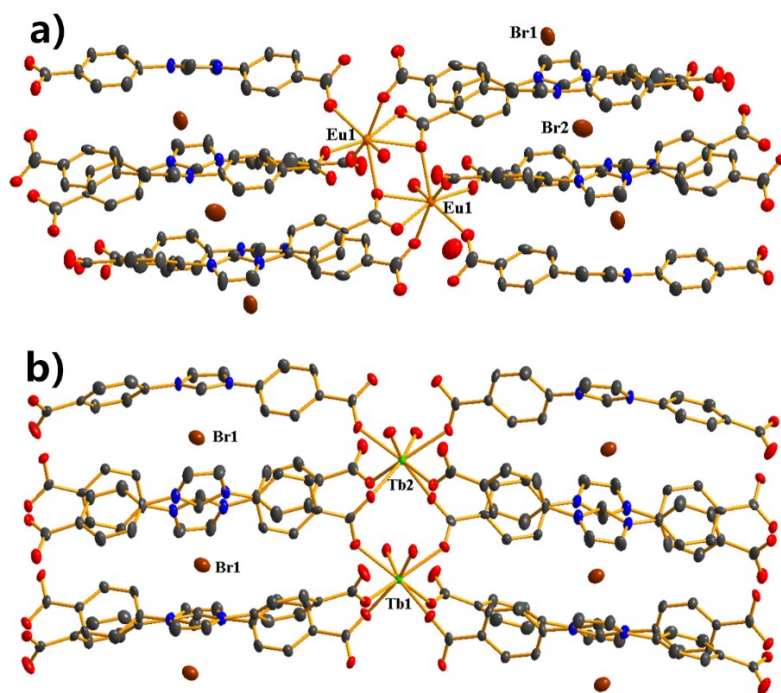

**Figure S12.** The ORTEP-style image of a) **EuBr** and b) **TbBr**.

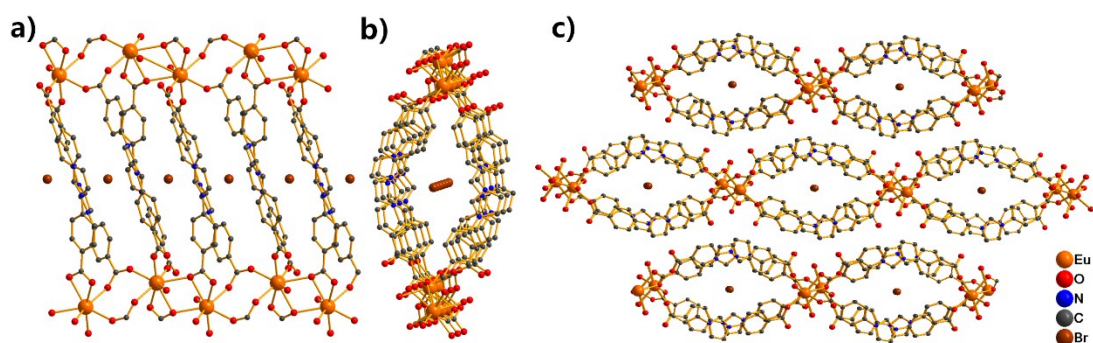

**Figure S13.** a) View of the 2D layer of **EuBr** along *b* axis direction. b) 1D channel of **EuBr** shown along *a* axis. c) Packing diagram along *a* axis showing three adjacent 2D layers.

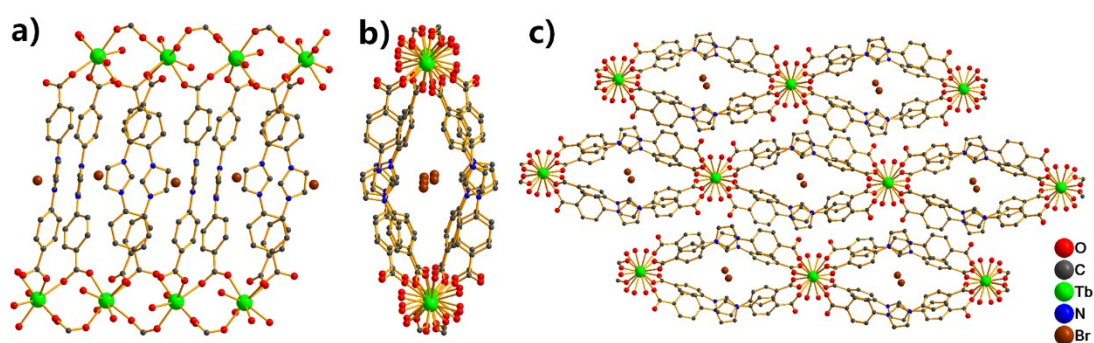

**Figure S13.** a) View of the 2D layer of **TbBr** along *a* axis direction. b) 1D channel of **TbBr** shown along *b* axis. c) Packing diagram along *b* axis showing three adjacent 2D layers.

**Table S1.** The Stern-Volmer equations and quenching effect constant ( $K_{sv}$ ) of **EuBr** and **TbBr** for nitro-explosive analytes.

| Analytes | Compound    | Stern-Volmer equation                | $K_{sv}(M^{-1})$ |
|----------|-------------|--------------------------------------|------------------|
| 1,3-DNB  | <b>EuBr</b> | $y = 3.3769x + 0.9483, R^2 = 0.9827$ | 3095             |
|          | <b>TbBr</b> | $y = 3.3266x + 0.9728, R^2 = 0.9903$ | 3356             |
| 2,4-DNT  | <b>EuBr</b> | $y = 3.2715x + 0.9907, R^2 = 0.9976$ | 3171             |
|          | <b>TbBr</b> | $y = 2.5527x + 0.9823, R^2 = 0.9890$ | 2475             |
| 4-NT     | <b>EuBr</b> | $y = 7.1303x + 0.9408, R^2 = 0.9922$ | 6755             |
|          | <b>TbBr</b> | $y = 9.3094x + 0.9471, R^2 = 0.9924$ | 8635             |
| NB       | <b>EuBr</b> | $y = 1.7992x + 1.0055, R^2 = 0.9919$ | 1830             |
|          | <b>TbBr</b> | $y = 2.4032x + 0.9975, R^2 = 0.9936$ | 2506             |
| TNT      | <b>EuBr</b> | $y = 2.5545x + 0.9899, R^2 = 0.9908$ | 2309             |
|          | <b>TbBr</b> | $y = 3.1032x + 0.9711, R^2 = 0.9909$ | 2976             |
